# Supplementary figures and images for: Enantioselective synthesis of Anomala osakana pheromone and Janus integer pheromone: a flexible approach to chiral γ-butyrolactones
Source: Royal Society of Chemistry journal article supplement (doi:10.1039/b909418k), 2009-01-01

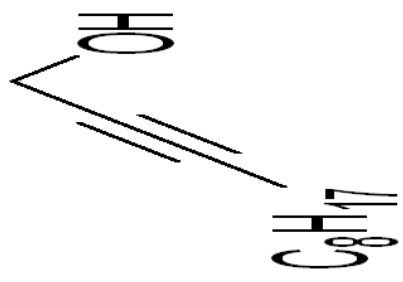

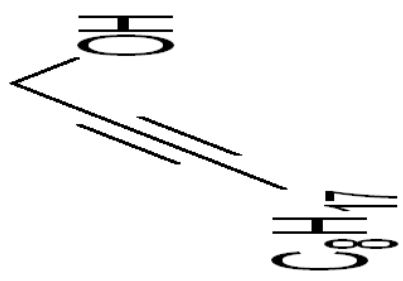

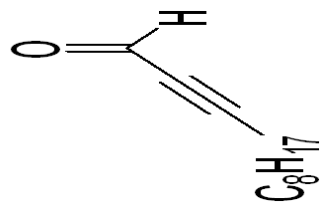

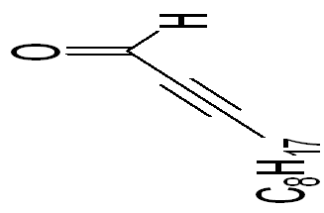

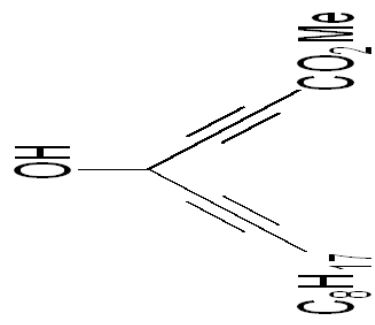

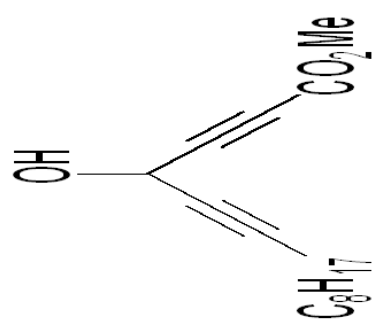

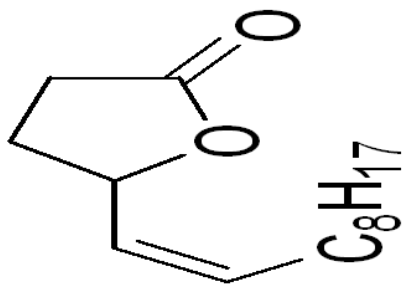

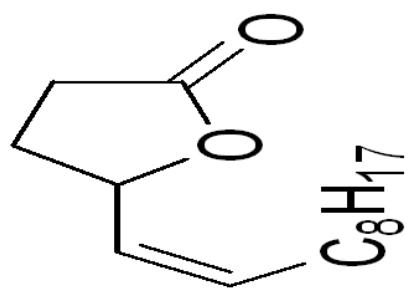

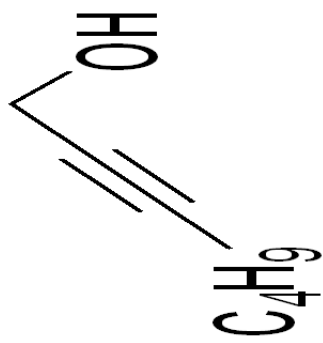

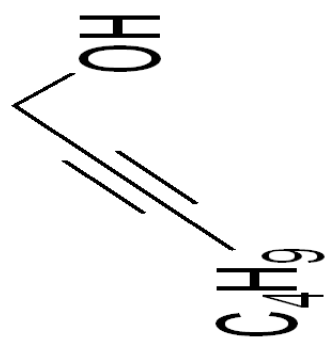

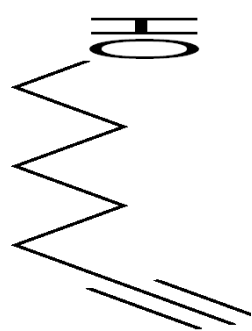

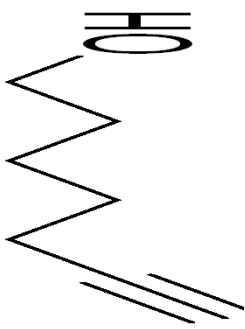

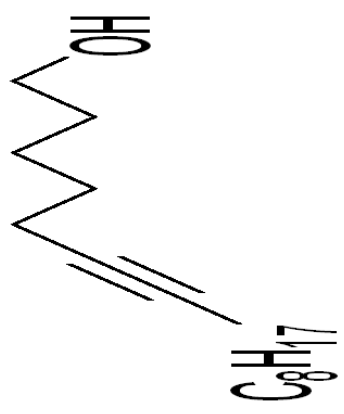

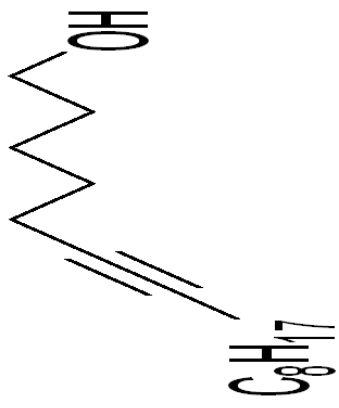

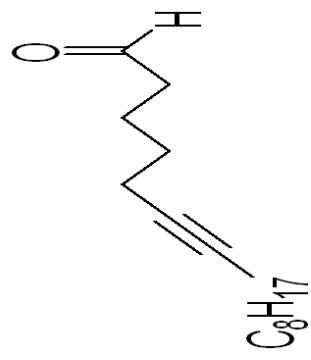

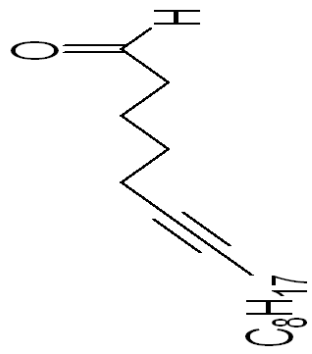

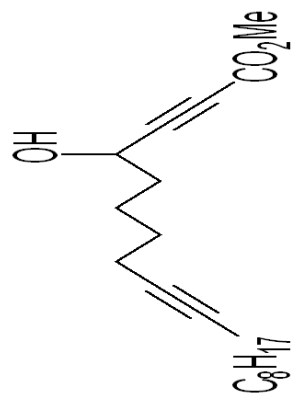

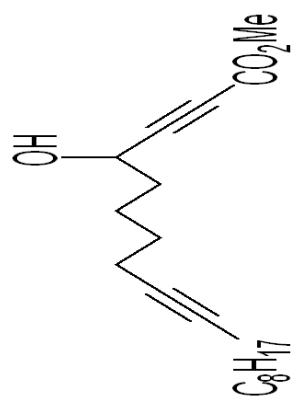

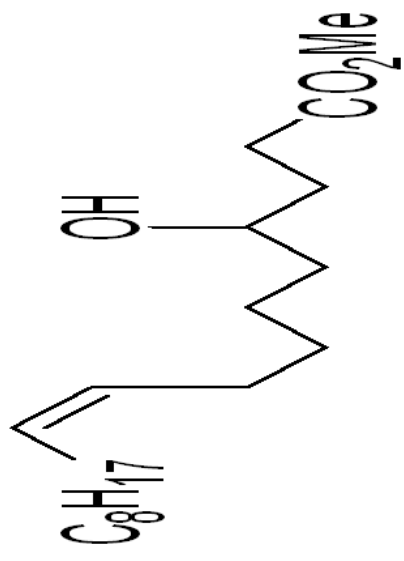

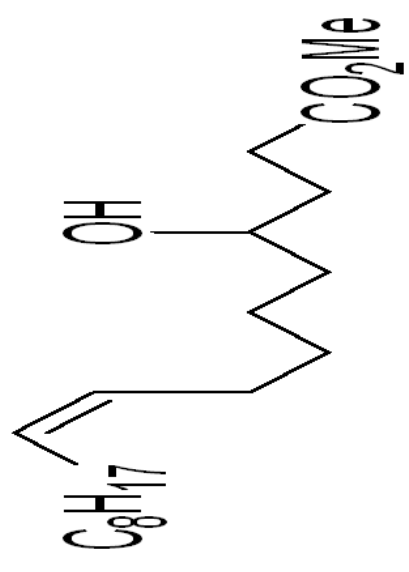

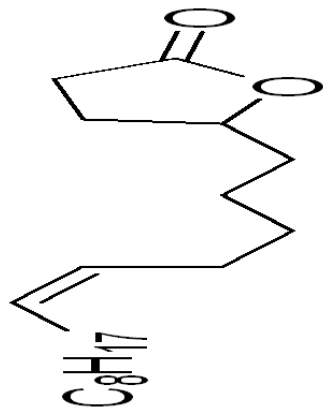

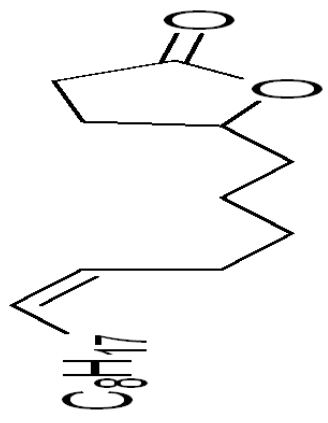

Supplement: b909418K.pdf [file b909418K.pdf]
